1 A high-throughput fluorescence-based assay for rapid identification of petroleum degrading bacteria

2

3

4

K. E. French<sup>1\*</sup> and N. Terry<sup>1</sup>

5

6 <sup>1</sup>Department of Plant and Microbial Biology, Koshland Hall, University of California Berkeley, Berkeley, CA

7

94720

8

9

\*Contact details: email: [katherine.french@berkeley.edu](mailto:katherine.french@berkeley.edu); tel: 617-435-7236

10

11

12

13

14

15

16

17

18

19

20

21

22

23

24

25

26

27

28

29

30

31

32

33

34

35

36

37

38

39

40

41

42

43

44

45 **Abstract**

46  
47 Over the past 100 years, oil spills and long-term waste deposition from oil refineries have significantly  
48 polluted the environment. These contaminants have widespread negative effects on human health and  
49 ecosystem functioning. Natural attenuation of long chain and polyaromatic hydrocarbons is slow and  
50 often incomplete. Bioaugmentation of polluted soils with indigenous bacteria that naturally consume  
51 petroleum hydrocarbons could speed up this process. However, the characterization of bacterial crude oil  
52 degradation efficiency—which often relies upon expensive, highly specialized gas-chromatography mass  
53 spectrometry analyses--can present a substantial bottleneck in developing and implementing these  
54 bioremediation strategies. Here, we develop a low-cost, rapid, high-throughput fluorescence-based assay  
55 for identifying wild-type bacteria that degrade crude oil using the dye Nile Red. We show that Nile Red  
56 fluoresces when in contact with crude oil and developed a robust linear model to calculate crude oil  
57 content in liquid cell cultures based on fluorescence intensity (FI). To test whether this assay could identify  
58 bacteria with enhanced metabolic capacities to break down crude oil, we screened bacteria isolated from  
59 a former Shell Oil refinery in Bay Point, CA and identified one strain (*Cupriavidus* sp. OPK) with superior  
60 crude oil depletion efficiencies (up to 83%) in only three days. We further illustrate that this assay can be  
61 combined with fluorescence microscopy to study how bacteria interact with crude oil and the strategies  
62 they use to degrade this complex substance. We show for the first time that bacteria use three key  
63 strategies for degrading crude oil: biofilm formation, direct adherence to oil droplets, and vesicle  
64 encapsulation of oil. We propose that the quantitative and qualitative data from this assay can be used to  
65 develop new bioremediation strategies based on bioaugmentation and/or biomimetic materials that  
66 imitate the natural ability of bacteria to degrade crude oil.

67  
68 Keywords: bioaugmentation, bioremediation, petroleum hydrocarbons, fluorescence microscopy,  
69 biomimicry

70  
71  
72  
73  
74  
75  
76  
77  
78  
79

## 80 **Introduction**

81 Over 50 million tons of crude oil have been spilled into the ocean and on land as a result of equipment  
82 failure, transportation accidents, and human tampering since the 1970s (Jernelöv 2010; ITOPF 2017). Such  
83 incidents negatively impact local ecosystems and decrease biodiversity in contaminated areas (Azevedo-  
84 Santos 2016; Das and Chandran 2011; Turner and Renegar 2017). As many of these compounds are  
85 carcinogens (e.g. pyrene, benzene), oil spills also present an unprecedented threat to human health. High  
86 molecular weight polyaromatic hydrocarbons (PAHs) like benzo(a)anthracene, benzo(a)pyrene, and  
87 benzo(g,h,i)perylene can accumulate to toxic levels in the air (de Gouw et al. 2011; Srogi 2007). Petroleum  
88 hydrocarbons can also contaminate land and water reservoirs, making these areas unsuitable for  
89 agriculture or settlement (Maliszewska-Kordybach and Smreczak 2000). Particularly in developing  
90 countries, these risks go unmitigated. For example, after a series of spills from Shell Oil pipes and refineries  
91 in the Niger Delta from the 1990s to early 2000s, drinking wells are currently contaminated with benzene  
92 levels that are 900x the safe level (Lindén and Pålsson 2013).

93  
94 Although the number of spills has declined over the past ten years, clean-up of historic spills is non-  
95 existent or often incomplete (Jernelöv 2010). Ocean spills rely on burning or mopping-up crude oil and  
96 relying on native ocean bacteria to break down the remaining petroleum hydrocarbons (Kostka et al.  
97 2011). Shoreline and inland spills are more difficult to clean up effectively. Environmental hazard teams  
98 often rely on chemical washing or removal of contaminated sand or soil, and where this is not possible,  
99 natural attenuation of petroleum hydrocarbons by native organisms (Das and Chandran 2011; Li et al.  
100 2016). However, natural processes of degradation are often slow and only remove shorter-chain  
101 hydrocarbons. Long chain hydrocarbons and PAH often resist degradation because they are inaccessible  
102 to organisms (due to mineralization, hydrophobicity, toxicity, and adsorption onto soil particles) and only

103 a small number of bacteria have the metabolic capacity to degrade these compounds (Bamforth and  
104 Singleton 2005).

105  
106 Bioremediation using bacteria isolated from polluted sites may enhance the speed and efficiency of  
107 petroleum hydrocarbon removal (Bento et al. 2005; Das and Chandron 2011). The advantage of using  
108 indigenous bacteria is two-fold: these bacteria are already equipped to handle local environmental  
109 conditions and it gets around regulatory hurdles which may prohibit the introduction of foreign (or  
110 genetically engineered) bacteria into the area (Thompson et al. 2005; Urgan-Demirtas et al. 2006). Known  
111 bacterial petroleum hydrocarbon degraders include *Alcanivorax borkumensis*, *Bacillus subtilis*,  
112 *Burkholderia cepacia*, *Pseudomonas fluorescens*, *Pseudomonas marginalis*, and *Pseudomonas oleovorans*  
113 (Brooijmans et al. 2009; Rojo et al. 2009). These bacteria contain monooxygenases and dioxygenases  
114 which insert oxygen into petroleum hydrocarbons to break down their carbon structure (Wang and Shao  
115 2013). Some bacteria also produce secondary compounds, namely biosurfactants, which make crude oil  
116 more accessible (Mohanty et al. 2013). Biosurfactants reduce the surface tension between the oil and  
117 water interface and allow recalcitrant compounds, like PAHs, to precipitate into the aqueous phase, where  
118 they can then be metabolized by bacteria.

119  
120 Inocula can be made of selected petroleum degrading bacteria and then applied to polluted land as a form  
121 of bioaugmentation. However, screening, identification, and characterization can be a time-consuming  
122 and expensive process. Traditional methods to characterize bacterial degradation of crude oil rely on gas  
123 chromatography mass spectrometry (GC/MS). This method requires specialized compound databases and  
124 the analytical capacity to analyze crude oil-which many mass spectrometry labs do not have. Few  
125 commercial companies will analyze crude oil from cell culture, and when this is possible, large volumes of  
126 culture are needed and tests can cost >\$400 per sample for custom analyses. From any given site, over

127 100 strains of bacteria might be isolated. The cost of such analyses could be prohibitive in cases where  
128 funding is limited. For example, analysis of 100 strains with three replicates at \$470 per sample would be  
129 \$141,000.

130  
131 To speed up the process of discovery, we sought to exploit the optical properties of the dye Nile Red to  
132 develop a high-throughput fluorescence-based assay that uses 96-well microtiter plates and a plate reader  
133 to detect bacteria that can degrade petroleum hydrocarbons. Nile Red is a colorless compound which  
134 fluoresces red when in contact with hydrophobic substances (Greenspan and Fowler 1985). It is often  
135 used as a stain for lipids and fatty acids (Greenspan et al. 1985; Rumin et al. 2015; Shrivastav et al. 2010),  
136 but has never been used, to our knowledge, as a way to measure the amount of crude oil in cell culture  
137 media or in environmental samples.

138  
139 Our research had three key objectives: (1) to determine whether there was a correlation between  
140 fluorescence intensity (FI) and crude oil content, (2) to develop a new model to calculate crude oil content  
141 based on FI, and (3) to identify whether this assay could detect bacterial strains isolated from the natural  
142 environment that are able to degrade crude oil. Based upon statistical analysis of assay data, we show  
143 that this assay can measure and calculate crude oil degradation by wild-type bacteria down to the level  
144 of 1.25 nl/ $\mu$ l in as little as three days. We also suggest that this assay can be a powerful new tool to study  
145 *how* bacteria degrade crude oil. When combined with fluorescence microscopy, we show that bacterial  
146 mechanisms for dispersing, sequestering, and degrading crude oil can be observed and analyzed. We  
147 anticipate that this assay can be used not only to rapidly detect novel bacteria for bioremediation, but to  
148 also advance the development of new bio-inspired solutions to remove petroleum hydrocarbons from the  
149 environment.

150

## 151 Results & Discussion

152

153 To determine whether the fluorescence intensity of Nile-Red stained crude oil was correlated with crude  
154 oil content, we set up 96-well plates with two serial dilutions of crude oil (1  $\mu$ l - 16  $\mu$ l, and 250 nl – 4  $\mu$ l,  
155 equivalent to 1-8% and 0.125%-2% crude oil respectively) as described in the method section. Each plate  
156 received four treatments: LB without bacteria, LB with bacteria, MSM without bacteria and MSM with  
157 bacteria. For these initial proof-of-concept assays, we randomly selected a bacterial strain (*Cupriavidus*  
158 sp. strain OPK) from our freezer stocks as a model bacterium. At day 0 ( $T_0$ ), there was a strong correlation  
159 between fluorescence intensity (FI) and optical density (OD) for all treatments (cells vs. no-cells with LB  
160 or MSM) (**Fig. 1A-B**). This indicates FI is a strong proxy for crude oil content. After  $T_0$ , for the wells  
161 containing bacteria the correlation between FI and OD varied as cells proliferated and the amount of crude  
162 oil declined.

163

164 To determine the strength of the relationship between FI and crude oil content, we created several linear  
165 models from the  $T_0$  data for each of the treatments (described fully in the method section). The final  
166 model used for calibration was based on the MSM with bacteria treatment (**Fig. 1C**). The model had an  
167  $R^2$  of 0.83 with a y-intercept of  $188.9 \pm 22.37$  and a concentration coefficient of  $194.4 \pm 11.11$  with a  
168 residual standard error of 124 on 61 degrees of freedom ( $F_{1,61} = 305.9$ ,  $p < 0.0001$ ). The standard errors and  
169 their fitted values were randomly distributed, the residual errors were normally distributed in the Q-Q  
170 plot, and Cooks' Distances among all points was less than 1 (**SI Fig. 1**). The final calibration equation is  $y$   
171  $= 194.4x + 188.9$ . To calculate crude oil depletion efficiency, we developed an additional approach based  
172 on the following equation:  $DE = (FIT_0 - FIT_3) / FIT_0$ , where DE is the 'depletion efficiency' and  $FI_x$  is the  
173 fluorescence intensity on day x. The calibration curve and depletion efficiency equation thus provide two  
174 approaches to detect and quantify bacterial crude oil degradation.

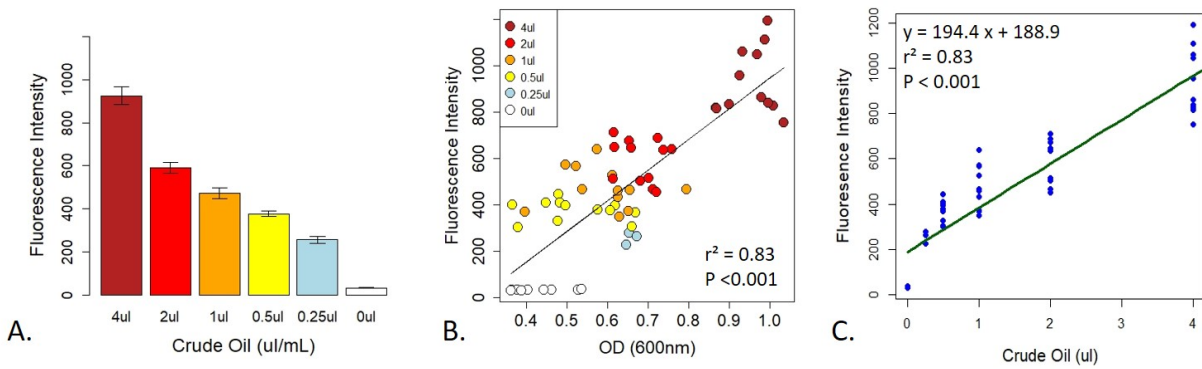

175

176 **Figure 1: Correlation between fluorescence intensity and crude oil content.** There was a strong relationship  
177 between fluorescence intensity and crude oil content when crude oil was incubated with Nile Red (A). This  
178 relationship was confirmed by the strong correlation between crude oil fluorescence intensity and optical density  
179 on  $D_0$  (B). Figure 1.C represents the linear model calibrating fluorescence intensity with crude oil content. All  
180 fluorescence intensity data is based on excitation at 535nm and emission at 650nm.  
181

182 To optimize assay parameters, we conducted a series of experiments to determine whether cell culture  
183 media or the presence of bacteria could alter the fluorescence of Nile Red-stained crude oil, leading to an  
184 over or under estimation of crude oil content. We found media type did not interfere, in terms of  
185 fluorescence quenching or overlapping in excitation/emission spectra, with the fluorescence of the Nile-  
186 Red stained crude oil. T-tests showed that there was no difference in fluorescence intensity in wells filled  
187 with bacteria and LB or MSM ( $t = 1.27$ ,  $df = 30.25$ ,  $p = 0.21$ ) or in wells without bacteria in LB or MSM ( $t =$   
188  $0.88$ ,  $df = 33.26$ ,  $p = 0.38$ ). This indicates that cell and media autofluorescence is minimal and does not  
189 over-lap with the crude oil fluorescence. Although media-type did not affect the fluorescence of the Nile  
190 Red, we found that using Minimal Salt Media in the assays may provide a more accurate measure of  
191 bacterial crude oil degradation. The microbial rate of crude oil degradation was almost 10% greater in  
192 the presence of MSM. *Cupriavidus* sp. strain OPK grown in LB degraded on average 74% of the crude oil  
193 while *Cupriavidus* sp. strain OPK in MSM reduced crude oil by 83% ( $t = -2.8$ ,  $df = 3.96$ ,  $p = 0.04$ ); however,  
194 there was no difference in the final biomass between the two treatments ( $t = -1.78$ ,  $df = 2.77$ ,  $p = 0.18$ ).

195 (SI Fig. 2). This is likely due to the fact that in MSM crude oil is the only source of nutrients while in LB  
196 there are other nutrients (e.g. amino acids from yeast extract) which could support bacterial metabolism.  
197  
198 To further test whether this assay could be used to distinguish differences in the efficiency of bacterial  
199 degradation of crude oil, we tested three strains of bacteria previously isolated from Shell Pond, a  
200 petroleum contaminated site in Bay Point, CA (Fig. 2). The site was a former Shell Refinery, where  
201 petroleum byproducts and other chemicals were deposited from the 1950s until the 1970s. Of the three  
202 bacterial species, two species (*Cupriavidus* sp. strain OPK and *Rhodococcus erythropolis* strain OSPS1)  
203 performed the best, depleting  $69 \pm 0.03\%$  and  $62 \pm 0.03\%$  of crude oil, respectively. The *Pseudomonas* sp.  
204 strain BSS only depleted  $49 \pm 0.03\%$  of the crude oil. In contrast, minimal degradation was seen in control  
205 experiments using *E. coli* DH5 $\alpha$  (loss of crude oil was between 1-3%, the same amount seen in the control  
206 wells with only crude oil and no bacteria). Although we used this assay to quantify bacterial efficiency at  
207 degrading crude oil under neutral circumstances, it could also be used in the future to look at how bacteria  
208 degrade crude oil under a gradient of different conditions (such as pH, temperature, or biostimulants) or  
209 other ecological variables like competition.

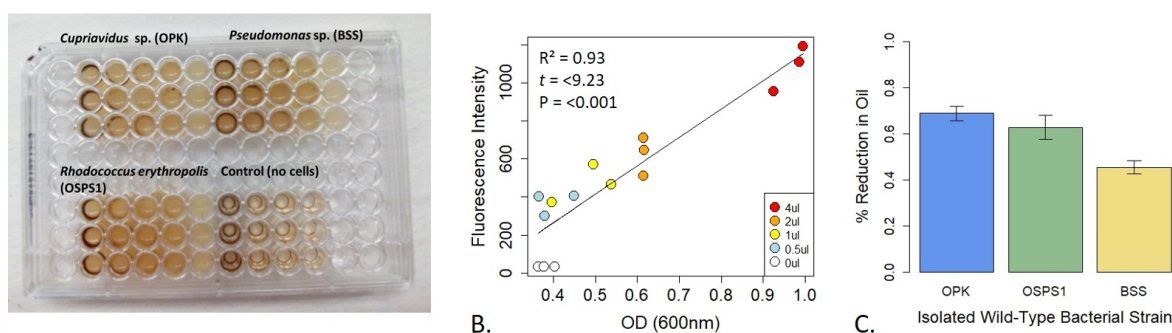

210

211 **Fig. 2. Design and performance of a fluorescence-based assay to detect bacteria that degrade crude oil.** A. Assay  
212 of three bacteria isolated from Shell Pond after 3 days of exposure to crude oil (concentrations ranging from 0.125%  
213 - 2%) in Minimal Salt Media (MSM). Consumption of crude oil can be seen in wells with bacteria. B. Correlation  
214 between fluorescence intensity (FI) and optical density (OD). Each point in the plot represents the treatments from  
215 2A (decreasing from 4  $\mu$ l to 0.5  $\mu$ l per well, for a concentration of 2 to 0.125 % crude oil per 200  $\mu$ l well volume) at  
216 T<sub>0</sub>. Correlation between FI and OD for each treatment was  $>0.9$  at T<sub>0</sub>, demonstrating the replicability of this assay.  
217 C. Amount of crude oil consumed by each bacterial strain when grown in 2% crude oil.



218

219 We also found that this assay lends itself well to investigating how bacteria interact with crude oil. For the  
220 above experiments, we extracted 1  $\mu$ l of each bacterial strain from the 96-well plate at T<sub>3</sub>, T<sub>10</sub>, and T<sub>20</sub> for  
221 fluorescence microscopy analysis. We found that each bacterial strain used a different strategy to  
222 sequester and break down crude oil.

223

224 The two most efficient strains relied on direct metabolism of crude oil. *Cupriavidus* sp. strain OPK formed  
225 biofilm network for long-distance transport of crude oil (**Fig. 3A**). These biofilms attached to the crude oil  
226 floating on the surface of the cell culture media and were anchored to the bottom of the microtiter well.  
227 Transport of crude oil through a network may allow for the efficient diffusion of petroleum hydrocarbons  
228 across highly specialized membranes embedded with monooxygenases and dioxygenases that break  
229 down petroleum hydrocarbons, such as alkB and p450cam (Gkorezis et al. 2016; French et al. *in prep*).  
230 Petroleum compounds degraded in this manner would be dispersed within the biofilm community. This  
231 efficient mode of crude oil dispersion and consumption may explain why this strain was the most effective  
232 at degrading crude oil. In contrast, *Rhodococcus erythropolis* strain OSPA1 attached directly to crude oil  
233 droplets (**Fig. 3B**). Other studies have shown that bacteria, such as *Alcanivorax borkumensi*, can attach to  
234 crude oil using exopolysaccharides and pili (Brooijmans et al. 2009). This approach to degradation benefits  
235 individual bacteria: the compounds they metabolize go directly to their own growth and development.  
236 Crude oil is a complex substrate made of thousands of compounds, some of which may be toxic to bacteria  
237 (Xu et al. 2018). Potentially, both strains are able to withstand exposure to toxic elements while selectively  
238 metabolizing certain compounds.

239

240 In contrast, *Pseudomonas* sp. strain BSS relied on external metabolism of crude oil by encapsulating crude  
241 oil into vesicles. These vesicles were 4.17 -12.34  $\mu$ m in diameter which contained small oil droplets ranging

242 from 0.11 to 2.98  $\mu\text{m}$  in diameter (**Fig. 3C; SI Fig. 3A**). In a few cases, these vesicles also contained bacteria  
243 (**SI Fig. 3B**). We believe these vesicles spontaneously form when *Pseudomonas* sp. strain BSS releases  
244 biosurfactants. We have observed a similar phenomenon in other wild-type strains of bacteria that  
245 produce biosurfactants (**SI Fig. 4**) and we know that *Pseudomonas* species produce rhamnolipids during  
246 the degradation of petroleum hydrocarbons (Hua and Wang 2014; Mulligan and Gibbs 2004). Our follow-  
247 up experimental research also confirms that biosurfactants can spontaneously form vesicles 5-150  $\mu\text{m}$  in  
248 diameter in the presence of water and crude oil (**SI Fig. 5**). Surfactant-based degradation of crude oil offers  
249 several benefits: crude oil is broken up into smaller, easier to degrade droplets; PAHs may become more  
250 soluble in water; and a barrier is placed between the bacteria and potentially harmful compounds in crude  
251 oil.

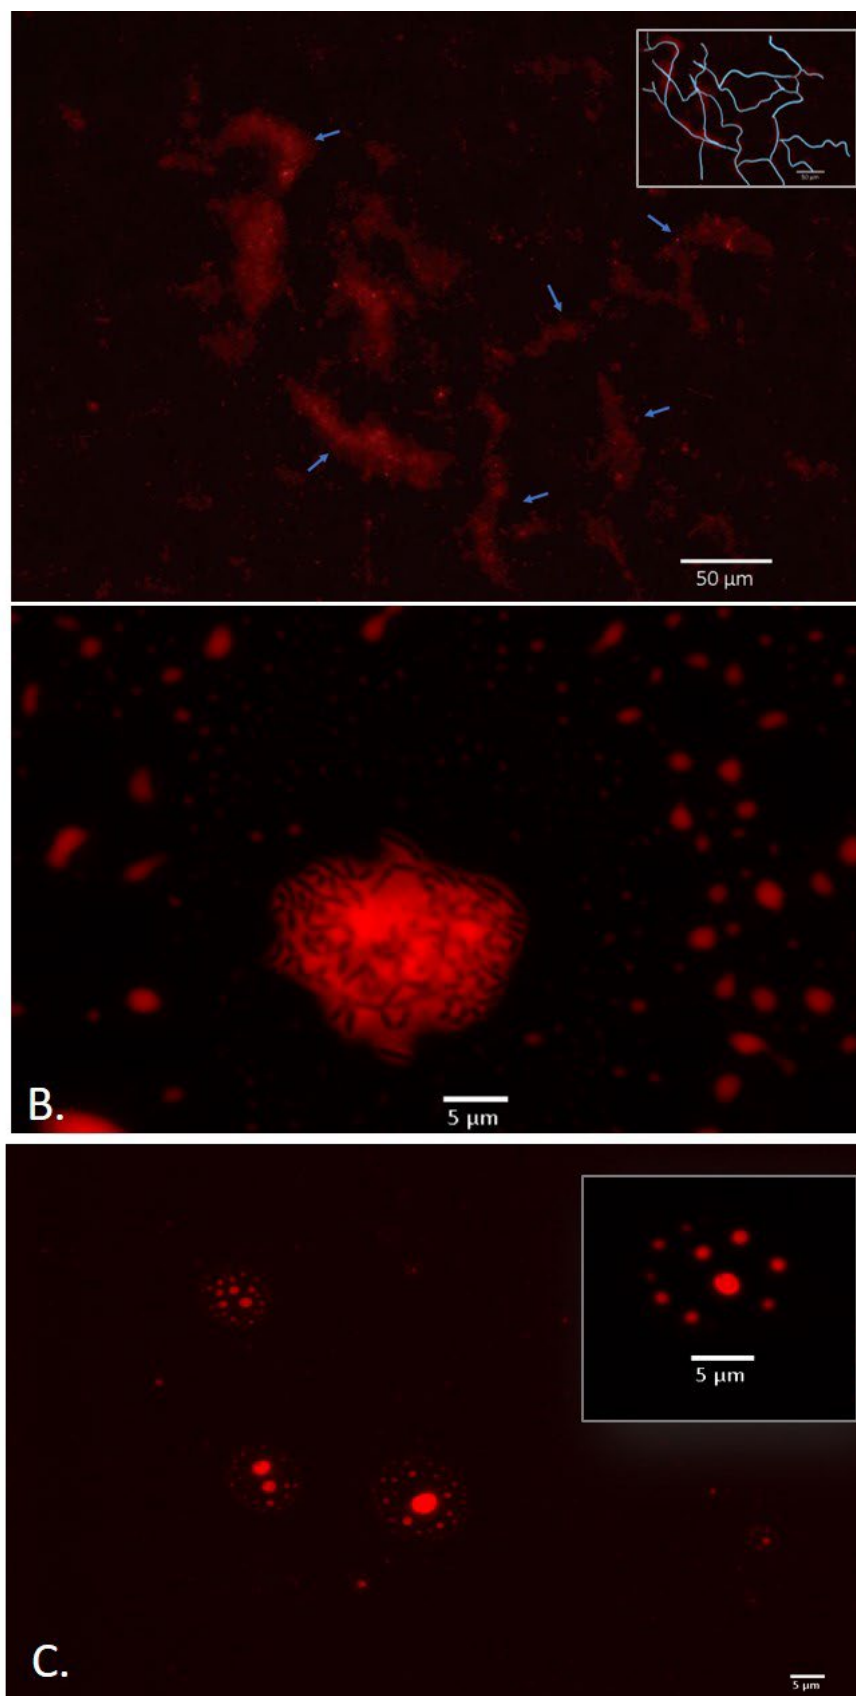

**Figure 3 Bacterial strategies for crude oil degradation.** A. *Cupriavidus* sp. OPK transported crude oil through biofilm networks after exposure to 1-12.5% crude oil for 3 days. Blue arrows point to channels within the network; the inset box shows a rough tracing of the network for clarity. B. *Rhodococcus erythropolis* strain OSPS1 (black rods) adhered to crude oil droplets. The oil droplet depicted is 21.03  $\mu\text{m}$  in diameter. C. *Pseudomonas* sp. strain BSS produced biosurfactants when exposed to crude oil which spontaneously formed vesicles. The vesicle depicted inset is 11.31  $\mu\text{m}$  in diameter and contains small oil droplets ranging in size from 790 nm - 1.33  $\mu\text{m}$  in diameter. All images are false-colored red; detailed description of image acquisition can be found in the Methods section.

289 Apart from advancing our fundamental knowledge of how bacteria degrade crude oil, the qualitative data  
290 garnered from this assay could be used in conjunction with the quantitative data on bacterial crude oil  
291 depletion efficiencies to select specific strains for different applications. For example, strains like  
292 *Cupriavidus* sp. strain OPK and *Rhodococcus erythropolis* strain OSPA1 might be more suitable for direct  
293 application to polluted soils as inoculum. They could also be applied in large quantities to bioreactors  
294 containing polluted soil (Robles-González et al. 2008). In contrast, strains like *Pseudomonas* sp. BSS might  
295 be more suitable for clean up of soils and water dominated by recalcitrant PAHs, where production of  
296 biosurfactants would be an asset (Bezza and Chirwa 2016).

297  
298 This qualitative data could also be used to develop *de novo* bio-inspired solutions for bioremediation.  
299 Further genetic, molecular, and ecological analysis of bacteria screened using the Nile Red assay could  
300 lead to new ways to augment these capabilities or to develop new biomaterials that can degrade target  
301 toxins in the environment (**Fig. 4**). For example, research on the relationship between biofilm formation  
302 and petroleum degradation could lead to bioinspired filters which could be used for water purification.  
303 Similarly, understanding the structure, chemical composition and function of biosurfactant-based vesicles  
304 could be used to create synthetic vesicles for enhanced removal of recalcitrant PAHs from highly polluted  
305 environments where living inoculum might not survive. Increased academic and industrial interest in  
306 using synthetic biology to develop bio-based solutions to global challenges like environmental pollution  
307 mean that such solutions are on the horizon (French 2019).

## Overview of the Bio-Design Process

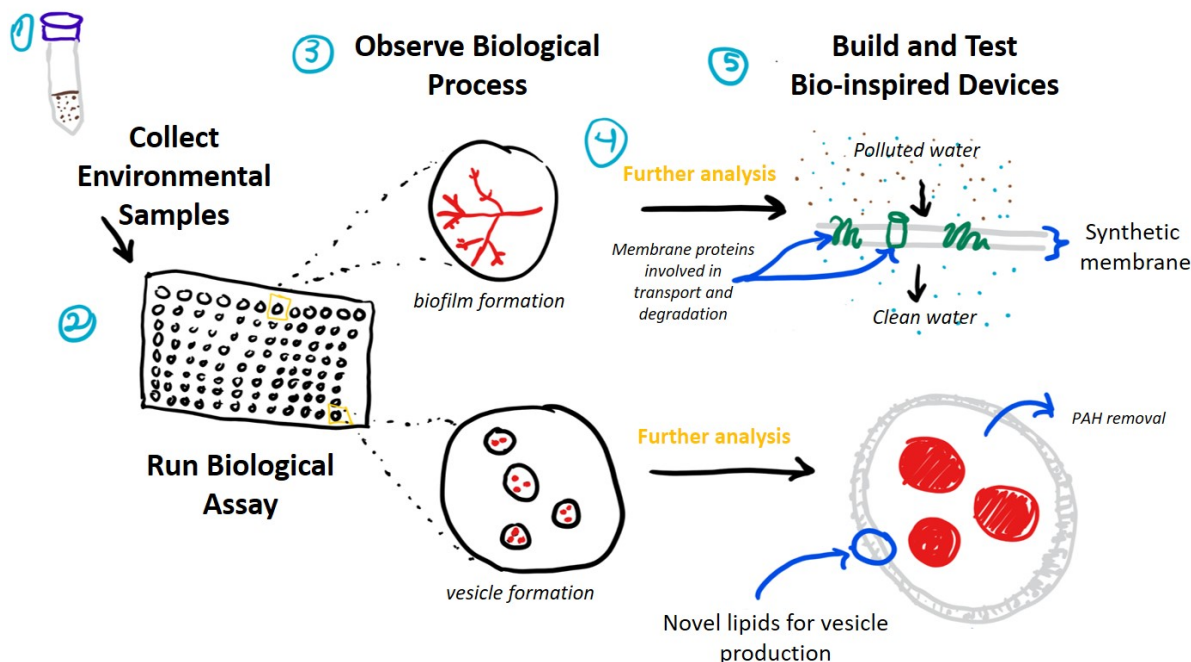

308

309 **Figure 4: Incorporation of crude oil degradation assay into bio-design processes.** Understanding how bacteria  
310 degrade crude oil could lead to the development of novel materials and devices for bioremediation. Examples  
311 include the creation of biofilters for water filtration (embedded with enzymes involved in hydrocarbon transport  
312 and degradation) and synthetic vesicles composed of bacterial-derived lipids for the removal of PAHs from complex  
313 hydrocarbon mixtures. The assay is compatible with a number of downstream analyses, including DNA extraction  
314 (e.g. to identify bacterial species, genes involved in hydrocarbon degradation) and mass spectrometry (e.g. LC/MS  
315 and MALDI to identify membrane proteins and lipids).

316

### 317 Conclusion

318

319 Toxic compounds released during crude oil spills and waste from crude oil refineries threaten ecosystem  
320 functioning, local biodiversity, and human health. The versatile assay we have developed here will hasten  
321 our ability to identify bacteria that efficiently degrade petroleum hydrocarbons and could lead to the  
322 development of new bio-inspired solutions to cleaning up oil spills. Future research could develop  
323 variations on this fluorescence-based assay to rapidly identify bacteria that can degrade single  
324 hydrocarbon substrates (e.g. pyrene) or other classes of toxic environmental compounds (e.g.  
325 polychlorinated biphenyls, PCBs). Consequently, we anticipate that the assay system presented here

326 could be used and modified by microbiologists, ecologists and engineers for a variety of applications  
327 within the fundamental and applied sciences.

328

## 329 **Methods**

330

### 331 *Growth of bacterial strains*

332 Bacteria were isolated from native soil taken from Shell Pond in 2016. Isolation methods are described in  
333 Xia et al. (2017). These strains were kept at 80°C in glycerol stocks. E.coli DH5α was used as a negative  
334 control. To revive each strain, a small amount of stock culture was incubated in 10 mL of LB at 37°C for  
335 three days. Each strain was plated on LB plates to create single colonies. From here, single colonies were  
336 selected and grown in 5 mL of LB for 16 hours.

337

### 338 *Nile Red stock solutions*

339 1 mM and 0.1 mM stock solutions of Nile Red were made in DMSO. These stock solutions were encased  
340 in tin foil and kept in a -20°C freezer until use.

341

### 342 *Addition of Nile Red to crude oil*

343 To determine whether concentration of Nile red had an effect on fluorescence intensity, we conducted  
344 several assays with three concentrations of Nile Red (0.1%, 0.5%, and 1%) for the 1 mM and 0.1 mM stock  
345 solutions. First, we sterilized the crude oil by autoclaving it three times and filtering it twice with 0.22 μm  
346 filters. Next, each concentration of Nile Red was incubated with 1 mL of crude oil for 20 minutes in 2 mL  
347 Eppendorf tubes. The Nile Red-crude oil solution was shaken periodically to assure the mixing of the two  
348 substances. We found that more consistent results were found with the 1% concentration of the 1 mM  
349 stock solution of Nile Red. This may be due to the low concentration of DMSO in the 1 mM stock solution,

350 which allows for a more even complexing of the dye and the crude oil. We observed that the DMSO in the  
351 more diluted stock solution (0.1 mM) tended to pool at the bottom of the Eppendorf after complexing  
352 with the oil for 20 minutes. To determine the stability of the Nile Red-crude oil solutions, we left these  
353 solutions standing at room temperature in racks for 24 hours in full light. We observed a slight decrease  
354 in FI (roughly 20%), likely due to the fact that Nile Red is photo-sensitive and some bleaching may have  
355 occurred. As such, it is ideal to create new stock solutions of dyed crude oil before the start of each  
356 experiment.

357

#### 358 *Assay set up*

359 To set up each assay, 96 well plates were filled with crude oil which had been complexed with Nile Red as  
360 described above (ranging from 16  $\mu$ l - 250 nl). For the control wells, LB or MSM was added to the wells  
361 until a total of 200  $\mu$ l was reached. For wells containing bacteria, 100  $\mu$ l of bacteria in LB or MSM at an OD  
362 of 0.6 were added to each well; LB or MSM was then added to bring the total volume of each well to 200  
363  $\mu$ l. Each treatment was replicated three times. Assays were sealed with parafilm and placed on a shaking  
364 incubator (120 rpm) in a dark room. To measure FI and OD, we used a Tecan plate reader. OD readings  
365 were taken at 600 nm in a circular pattern with 4x4 readings. FI readings were taken at excitation 535nm  
366 and emission 650 nm in a circular pattern with 6x6 readings. We measured FI and OD every day from  $T_0$ -  
367  $T_5$  and then again at  $T_{10}$  and  $T_{20}$ .

368

#### 369 *Staining of biosurfactant-based vesicles*

370 Vesicles were stained with a 1  $\mu$ g/mL stock solution of FM™ 4-64 Dye (*N*-(3-Triethylammoniumpropyl)-4-  
371 (6-(4-(Diethylamino) Phenyl) Hexatrienyl) Pyridinium Dibromide) which was made with a potassium  
372 phosphate buffer (pH 7). Briefly, 20  $\mu$ l of culture was incubated with 20  $\mu$ l of dye for 30 minutes. 1  $\mu$ l of  
373 this solution was placed on a glass microscope slide and imaged with a fluorescent microscope.

374

375 *Microscopy*

376 1ul aliquots of media from 96 well plates were placed on glass microscope slides and imaged using a  
377 Zeiss AxioImager M1 with a Hamamatsu Orca 03 12-bit grayscale digital color camera. Images were taken  
378 at 40x and 100x. Nile Red was detected using the Texas Red filter. To image intact biofilms within each  
379 well in glass-bottom 96-well microtiter plates, we used a Zeiss AxioObserver Z1 Live-Cell system with a  
380 QImaging Retiga SRV and a QImaging 5MPix Micropublisher camera. Images were taken with a 0.01-0.05  
381 second exposure time (depending on magnification) and analyzed using the Zeiss Axio Vision software.

382

383 *Statistical analysis*

384 We used t-tests to determine whether media type (LB or MSM) had a significant effect on crude oil  
385 fluorescence. We used one-way analysis of variance (ANOVA) to determine whether Nile Red  
386 concentration had a significant effect on crude oil fluorescence intensity. Differences among treatments  
387 were assessed by reference to the standard F tests. We also used ANOVA to determine whether microbial  
388 strain had an effect on degradation of crude oil. Crude oil depletion efficiency (%) was calculated by taking  
389 the FI at  $D_0$  and subtracting the FI at  $D_3$ , divided by the FI at  $Day_0$ . We used Pearson Correlation analysis  
390 to determine whether there was a correlation between FI and OD. To create a calibration curve to relate  
391 FI to amount of crude oil, we created linear models and compared these to quadratic and polynomial  
392 models of the data, followed by visual examination of the residuals of each model to evaluate the  
393 suitability of each model for explaining the data. We further tested the validity of the slope and y-intercept  
394 values for the model using t-tests. The confidence interval for each is  $\beta_0 = b_0 \pm tsb_0$  and  $\beta_1 = b_1 \pm tsb_1$  where  
395  $sb_0$  and  $sb_1$  are the standard errors for the intercept and slope, respectively. To determine if there is a  
396 significant difference between the expected ( $\beta$ ) and calculated ( $b$ ) values we calculated t and compared it  
397 to its standard value for the correct number of degrees of freedom. We selected the model with the best



398 'fit' for the data based on R squared value and statistical significance. General statistics, ANOVA, and t-  
399 tests were conducted in R (v. 3.2.2, "Fire Safety") using packages stats (v. 3.4, R core team) and psych (v.  
400 1.6.4).

401  
402 **References**

- 403  
404 Azevedo-Santos, V.M., Garcia-Ayala, J.R., Fearnside, P.M., Esteves, F.A., Pelicice, F.M., Laurance, W.F.,  
405 Benine, R.C. 2016. Amazon aquatic biodiversity imperiled by oil spills. *Biodiversity Conservation* 25:  
406 2831–2834.  
407  
408 Bamforth, S. and I. Singleton. 2005. Bioremediation of polycyclic aromatic hydrocarbons: current  
409 knowledge and future directions. *Journal of Chemical Technology and Biotechnology* 80:723–736.  
410  
411 Bento, F.M., Camargo, F.A.O., Okeke, B.C., and Frankenberger, W.T. 2005. Comparative bioremediation  
412 of soils contaminated with diesel oil by natural attenuation, biostimulation and bioaugmentation.  
413 *Bioresource Technology* 96: 1049–1055.  
414  
415 Bezza, F.A., Chirwa, E.M.N. 2016. Biosurfactant-enhanced bioremediation of aged polycyclic aromatic  
416 hydrocarbons (PAHs) in creosote contaminated soil. *Chemosphere* 144: 635–644.  
417  
418 Broojimans, R., M. Pastink, and R. Siezen. 2009. Hydrocarbon-degrading bacteria: the oil-spill clean-up  
419 crew. *Microbial Biotechnology* 2.6: 587–594.  
420  
421 Das, N. and P. Chandran. 2011. Microbial Degradation of Petroleum Hydrocarbon Contaminants: An  
422 Overview. *Biotechnology Research International*. Article ID 941810. doi:10.4061/2011/941810.  
423  
424 French, K. 2019. Harnessing Synthetic Biology for Sustainable Development. *Nature Sustainability* 2:  
425 250-252.  
426  
427 de Gouw, J. A., A. M. Middlebrook, C. Warneke, R. Ahmadov, E. L. Atlas, R. Bahreini, D. R. Blake, C. A.  
428 Brock, J. Brioude, D. W. Fahey, F. C. Fehsenfeld, J. S. Holloway, M. Le Henaff, R. A. Lueb, S. A. McKeen, J.  
429 F. Meagher, D. M. Murphy, C. Paris, D. D. Parrish, A. E. Perring, I. B. Pollack, A. R. Ravishankara, A. L.  
430 Robinson, T. B. Ryerson, J. P. Schwarz, J. R. Spackman, A. Srinivasan, L. A. Watt. 2011. Organic Aerosol  
431 Formation Downwind from the Deepwater Horizon Oil Spill. *Science* 331. 6022: 1295-1299. DOI:  
432 10.1126/science.1200320  
433  
434 Gkorezis, P., M. Daghighi, A. Franzetti, J.D. Van Hamme, W. Sillen, and J. Vangronsveld. 2016. The  
435 Interaction between Plants and Bacteria in the Remediation of Petroleum Hydrocarbons: An  
436 Environmental Perspective. *Frontiers in Microbiology* 7:1836. doi: 10.3389/fmicb.2016.01836  
437  
438 Greenspan, P. and S. D. Fowler. 1985. Spectrofluorometric studies of the lipid probe, Nile red. *The*  
439 *Journal of Lipid Research*, 26, 781-789.  
440  
441 Greenspan, P. E.P. Mayer, and S.D. Fowler. 1985. Nile red: a selective fluorescent stain for intracellular  
442 lipid droplets. *Journal of Cell Biology* 100.3: 965-973.

- 443  
444 Hua, F., and H. Wang. 2014. Uptake and trans-membrane transport of petroleum hydrocarbons by  
445 microorganisms. *Biotechnology & Biotechnological Equipment* 28.2: 165–175.  
446  
447 ITOPF. 2018. Data & Statistics. <http://www.itopf.org/knowledge-resources/data-statistics/> Accessed on  
448 September 01, 2018.  
449  
450 Jernelöv, A. 2010. The Threats from Oil Spills: Now, Then, and in the Future. *Ambio* 39(5-6): 353–366.  
451  
452 Kostka, J., O. Prakash, W. Overholt, S. J. Green, G. Freyer, A. Canion, J. Delgardio, N. Norton, T. C. Hazen,  
453 and M. Huettel. 2011. Hydrocarbon-Degrading Bacteria and the Bacterial Community Response in Gulf  
454 of Mexico Beach Sands Impacted by the Deepwater Horizon Oil Spill. *Applied and Environmental*  
455 *Microbiology* 77.22: 7962–7974.  
456  
457 Li, T., H. Hu, L. Jin, B. Xue, Y. Zhang and Y. Guo. 2016. Enhanced bioremediation of crude oil in polluted  
458 beach sand by the combination of bioaugmentation and biodiesel. *Journal of Water Reuse and*  
459 *Desalination* 6.2: 264-273.  
460  
461 Lindén, O. and J. Pålsson. 2013. Oil Contamination in Ogoniland, Niger Delta. *Ambio* 42.6: 685–701.  
462  
463 Maliszewska-Kordybach, B. and B. Smreczak. 2000. Ecotoxicological Activity of Soils Polluted with  
464 Polycyclic Aromatic Hydrocarbons (PAHs) - Effect on Plants. *Environ Technol* 21.10: 1099–1110.  
465  
466 Mohanty, S., J. Jasmine, and S. Mukherji. Practical Considerations and Challenges Involved in  
467 Surfactant Enhanced Bioremediation of Oil. *BioMed Research International*. Article ID 328608.  
468 <http://dx.doi.org/10.1155/2013/328608>.  
469  
470 Mulligan, C. and B. Gibbs. 2004. Types, Production and Applications of Biosurfactants. *Proceedings of*  
471 *the Indian national Science Academy B70 No. 1: 31-55*.  
472  
473 Robles-González, I.V., Fava, F., Poggi-Varaldo, H.M. 2008. A review on slurry bioreactors for  
474 bioremediation of soils and sediments. *Microbial Cell Factory* 7: 5.  
475  
476 Rojo, F. 2009. Degradation of alkanes by bacteria. *Environmental Microbiology* 10.11: 2477–2490.  
477  
478 Rumin, J., H. Bonnefond, B. Saint-Jean, C. Rouxel, A. Sciandra, O. Bernard, J.P. Cadoret, J and G.  
479 Bougaran. 2015. The use of fluorescent Nile red and BODIPY for lipid measurement in microalgae.  
480 *Biotechnology for biofuels* 8: 42. doi:10.1186/s13068-015-0220-4  
481  
482 Shrivastav, A., S. K. Mishra, B. Shethia, I. Pancha, D. Jain, and S. Mishra. 2010. Isolation of promising  
483 bacterial strains from soil and marine environment for polyhydroxyalkanoates (PHAs) production  
484 utilizing *Jatropha* biodiesel byproduct. *International Journal of Biological Macromolecules* 47.2: 283-287.  
485  
486 Srogi, K. 2007. Monitoring of environmental exposure to polycyclic aromatic hydrocarbons: a review.  
487 *Environmental Chemistry Letters* 5.4: 169–195.  
488  
489 Thompson, I. P., Van Der Gast, C. J., Ciric, L. and Singer, A. C. 2005. Bioaugmentation for bioremediation:  
490 the challenge of strain selection. *Environmental Microbiology* 7: 909-915.

491  
492 Turner, N.R. and Renegar, D.A. 2017. Petroleum hydrocarbon toxicity to corals: A review. *Marine*  
493 *Pollution Bulletin* 119: 1–16.  
494  
495 Urgun-Demirtas, M., Stark, B., Pagilla, K. 2006. Use of Genetically Engineered Microorganisms (GEMs)  
496 for the Bioremediation of Contaminants. *Critical Reviews in Biotechnology* 26: 145–164.  
497  
498 Wang, W. and Z. Shao. 2013. Enzymes and genes involved in aerobic alkane degradation. *Frontiers in*  
499 *Microbiology* 4.116. doi: 10.3389/fmicb.2013.00116.  
500  
501 Xia, M., Y. Liu, A. Taylor, D. Fu, R. Khan, and N. Terry. 2017. Crude oil depletion by bacterial strains  
502 isolated from a petroleum hydrocarbon impacted solid waste management site in California.  
503 *International Biodeterioration and Biodegradation* 123: 70-77.  
504  
505 Xu X, Liu W, Tian S, et al. 2018. Petroleum Hydrocarbon-Degrading Bacteria for the Remediation of Oil  
506 Pollution Under Aerobic Conditions: A Perspective Analysis. *Frontiers in Microbiology* 9: 2885.
